# Supplementary material for: Role of endothelial microvesicles released by p-cresol on endothelial dysfunction
Source: PubMed Central journal article supplement (PMC7326964; doi:10.1038/s41598-020-67574-6), 2020-06-30
Supplement: 41598_2020_67574_MOESM1_ESM.pdf [file 41598_2020_67574_MOESM1_ESM.pdf]

## **Role of endothelial microvesicles released by p-cresol on endothelial dysfunction.**

Autores: Fatima Guerrero <sup>1,2,†,\*</sup>; Andres Carmona <sup>1,†</sup>; Teresa Obrero <sup>1</sup>; Maria Jose Jiménez <sup>1</sup>; Sagrario Soriano <sup>1,3,4</sup>; Juan Antonio Moreno <sup>1,5,\*</sup>; Alejandro Martín-Malo <sup>1,2,3,4,‡</sup>; Pedro Aljama <sup>1,2,‡</sup>.

1 Maimonides Biomedical Research Institute of Cordoba (IMIBIC), Reina Sofia University Hospital, University of Cordoba, Cordoba, Spain.

2 Department of Medicine, University of Cordoba, Cordoba, Spain.

3 Nephrology Unit, Reina Sofia University Hospital, Cordoba, Spain.

4 Spanish Renal Research Network (REDinREN), Institute of Health Carlos III. Madrid, Spain.

5 Department of Cell Biology, Physiology and Immunology, University of Cordoba, Cordoba, Spain.

† These authors contributed equally to this paper.

‡ These authors share senior authorship.

\*Correspondence and reprint requests: Fátima Guerrero, PhD. Maimonides Biomedical Research Institute of Cordoba (IMIBIC). Email: fatima.guerrero@imibic.org; and Juan Antonio Moreno, PhD. Department of Cell Biology, Physiology and Immunology, Maimonides Biomedical Research Institute of Cordoba (IMIBIC), University of Cordoba, Spain. Email: juan.moreno@uco.es

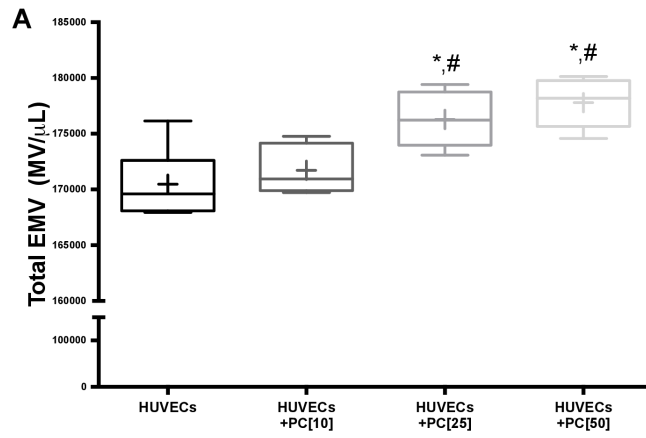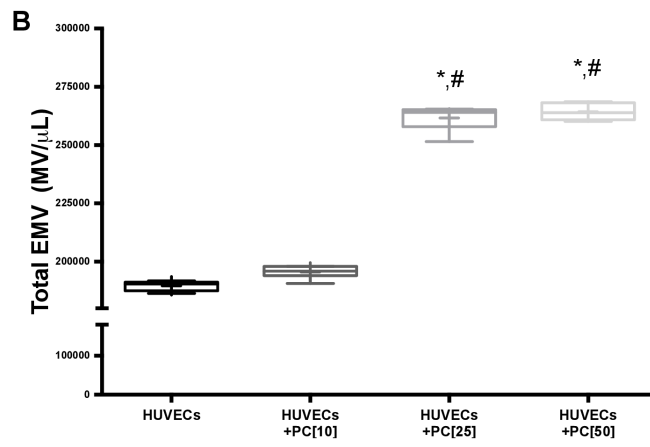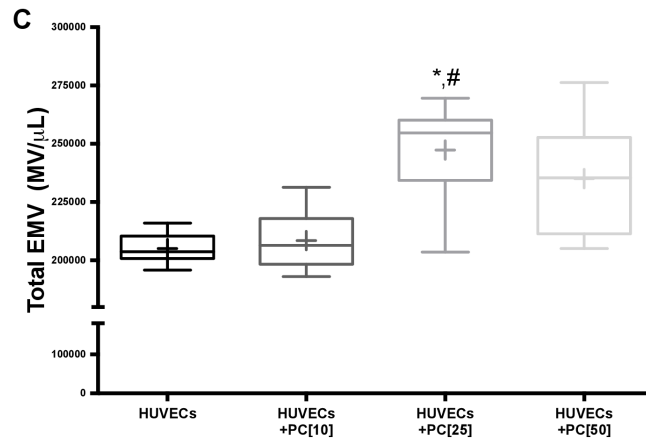

## Figure Legend

**Data Supplementary Figure 1.** Dose- and time-dependent effects of p-cresol on EMV release by HUVECs. HUVECs were treated with different concentrations of p-cresol (PC) to determine the production of EMV per microliter at 12 h (A), 24 h (B) and 48 h (C). Results are expressed as mean  $\pm$  SD; \*  $p < 0.05$  vs HUVECs, #  $p < 0.05$  vs HUVECs+PC[10].
